# Supplementary material
Source: Springer Nature journal article supplement (https://www.springermedizin.de/resource/supplementary/12955_2005_164_MOESM1_ESM.pdf/9559814)

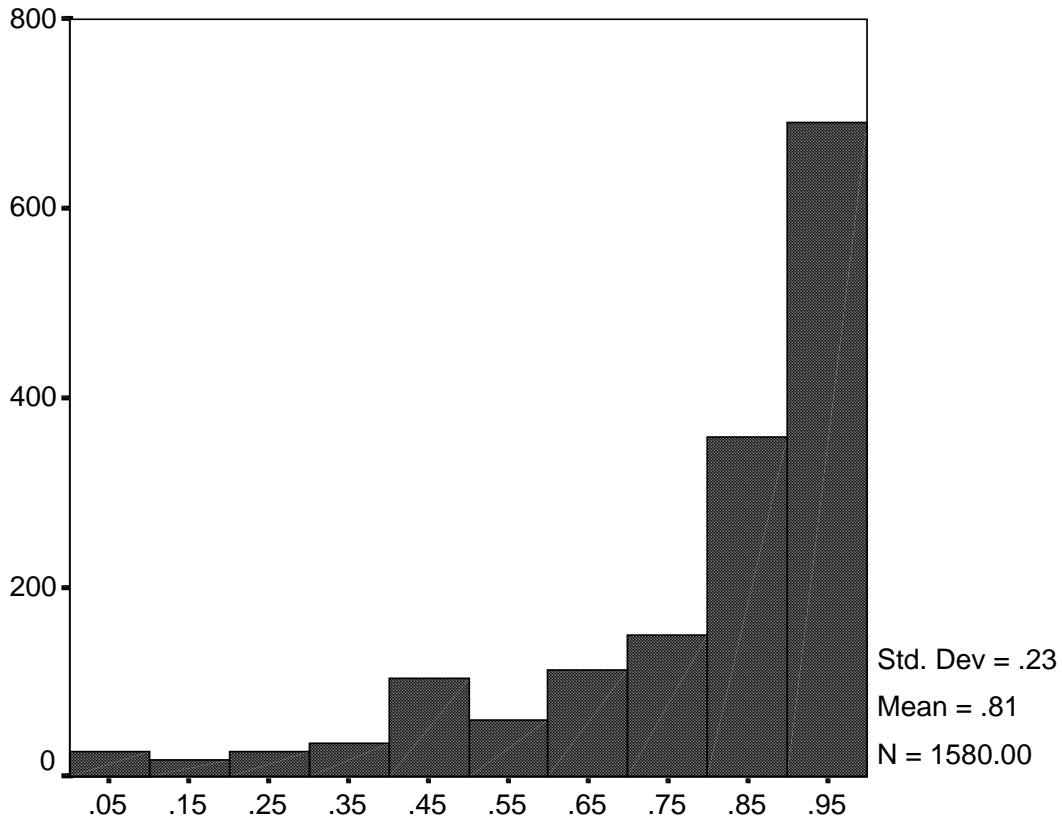

TTO values

Supplement: MOESM1 [file 9559814]
